# Supplementary material for: An effector from cotton bollworm oral secretion impairs host plant defense signaling
Source: PubMed Central journal article supplement — Proc Natl Acad Sci U S A. 2019 Jun 20;116(28):14331–8. doi: 10.1073/pnas.1905471116 (PMC6628814; doi:10.1073/pnas.1905471116), 2019-06-20
Supplement: pnas.1905471116.sapp.pdf [file pnas.1905471116.sapp.pdf]

1 Supplementary Information for:

2 **A Novel Effector from Cotton Bollworm Oral Secretion Impairs Host Plant Defense Signaling**

3 Chun-Yu Chen, Yao-Qian Liu, Wei-Meng Song, Dian-Yang Chen, Fang-Yan Chen, Xue-Ying Chen, Zhi-  
4 Wen Chen, Sheng-Xiang Ge, Chen-Zhu Wang, Shuai Zhan, Xiao-Ya Chen, Ying-Bo Mao

5 E-mail: ybmao@sibs.ac.cn

6

7 **This PDF file includes:**

8 SI Materials and Methods

9 Figs. S1 to S14

10 Tables S1 to S6

11 Caption for Movie S1

12 Captions for Datasets S1 to S2

13 References for SI reference citations

14

15 **Other supplementary materials for this manuscript include the following:**

16 Movie S1

17 Datasets S1 to S2

18 **SI Materials and Methods**

19 **Plant Materials and Treatments.** The tobacco plants (*Nicotiana benthamiana*), the pair of glanded and  
20 glandless isogenic lines of cotton plants (*Gossypium hirsutum*) (1) and the *Arabidopsis thaliana* (ecotype  
21 Col-0) plants were grown at 22°C under long-day (LD, 16 h light/8 h dark) condition. 35S:JAZ3-HA,  
22 35S:JAZ3 $\delta$ N-HA, *coi1-2* and *jazQ* are as described (2-4).

23 For overexpressing *HARP1* and *REPAT38* in *Arabidopsis*, the coding regions of *HARP1* and *REPAT38*  
24 were inserted into the binary vectors (pCAMBIA1300) behind the 35S promoter, respectively, with a  
25 6 $\times$ MYC N-terminal fusion. The dsHARP1-pBI121 were constructed as previously described (5). Briefly, a  
26 sense sequence of HARP1, a 120-nucleotide intron of *A. thaliana* RTM1 gene and the HARP1 in antisense  
27 orientation were constructed into pBI121 between the region of a 35S promoter and a NOS terminator.  
28 Then the constructed binary vectors were transferred into *Agrobacterium tumefaciens* strain GV3101  
29 (pMP90) by the freeze–thaw method. A floral dip method (6) was used to generate transgenic *Arabidopsis*  
30 which further screened by 40 mg/L hygromycin or 50mg/L Kanamycin on half-strength MS plates. For  
31 transiently expressing HARP1, GFP in tobacco (*N. benthamiana*), the *A. tumefaciens* cells carrying  
32 35S:6MYC-HARP1, 35S:GFP-HARP1 or 35S:GFP were resuspended in infiltration buffer at OD<sub>600</sub>= 0.8  
33 and injected into the *N. benthamiana* plant leaves of four weeks old. After 2-3 days, the leaves were used  
34 for assay.

35 The second pair of true leaves of *Arabidopsis* plants at the fast-expanding stage (about 16-day-old  
36 seedlings) and the first pair of true leaves of the *G. hirsutum* plants were used in wounding and MeJA  
37 treatments. For wounding assay, about 1/3 areas of the leaves were punched and the unwounded leaves  
38 were used as control. For oral secretion (OS) treatment, leaves were wounded and immediately painted

39 with different OS samples from 4th instar larvae that were reared on artificial diet (Fig. S1) or the 4<sup>th</sup> instar  
40 larvae which had reared on wild-type and 35S: *dsHARP1-4* plants for 4 days (Fig. 2E). For HARP1 and  
41 REPAT38 treatments, recombinant proteins of HARP1, REPAT38 and Venus (used as control) were  
42 purified and dissolved in 20 mM Tris-HCl buffer (pH 8.5) to a final concentration of 1 mg/ml. The wounded  
43 leaves were painted with indicated purified protein solutions. For MeJA assay, MeJA (Aldrich) was  
44 dissolved in ethanol to 50mM and was further diluted in a final concentration of 50  $\mu$ M in double-distilled  
45 water. Water solutions with 50  $\mu$ M MeJA or with an equal volume of ethanol (mock) were sprayed to aerial  
46 parts of the tested plants. All samples were harvested at the indicated time post-treatment and were used  
47 for qRT-PCR or other analyses as indicated. The oligonucleotide primers used in this investigation are  
48 given in *SI Appendix*, Table S5.

49 **Insect Culture and Feeding Test.** The cotton bollworm (*Helicoverpa armigera*), beet armyworm  
50 (*Spodoptera exigua*) and Diamondback moth (*Plutella xylostella*) eggs were obtained from the Institute of  
51 Zoology, Chinese Academy of Science. The larvae were reared in the laboratory at 25°C, 70% relative  
52 humidity and a 14-h-light/10-h-dark cycle. The modified artificial diet as described (5) and *Arabidopsis*  
53 leaves were used to feed the *H. armigera* and *P. xylostella* larvae, as indicated. For insect feeding test,  
54 second-instar or third-instar larvae of *H. armigera* at synchronous later stage were weighed individually,  
55 and for *P. xylostella*, every 5 third-instar larvae were weighted together. Larvae were divided into groups  
56 and each group contained 15–30 individuals. When fed on plants, the individual *H. armigera* larva was  
57 raised in separate container and fed with 1-2 *Arabidopsis* plants. The larva was transferred to fresh plants  
58 once a day. For *P. xylostella* larvae, every 5 larvae were raised in one container and fed with 1-2  
59 *Arabidopsis* plants or at least two tobacco leaves transiently expressed HARP1 or GFP, and the

60 plants/leaves were changed once a day. After fed on indicated diets for indicated days, weight increases  
61 were recorded.

62 **OS Collection and Preparation.** For OS collection, the larva was gently fixed between fingers and thumb,  
63 and was softly touched by a 0.1-10  $\mu$ l pipette tip at the larval mouth cavity. Usually the larvae would spit  
64 out OS under such stimuli (Movie S1). The OS sample was then collected into a tube. The samples were  
65 centrifuged at 12,000 $\times$  rpm for 10 min at 4 $^{\circ}$ C to get rid of the food debris and the supernatants were used  
66 for further study.

67 **Yeast Two Hybrid.** HARP1, REPAT38 and PXHL1 were introduced into the pGBKT7 (Clontech). A series  
68 of JAZs from *Arabidopsis* (JAZ1, JAZ2, JAZ4, JAZ5, JAZ7, JAZ9, JAZ10, JAZ11, JAZ12 and JAZ3 (JAZ3,  
69 JAZ3 $\delta$ N, JAZ3 $\delta$ C, JAZ3 $\delta$ ZIM)) (4), *G. hirsutum* (Gh\_A12G2441, Gh\_D12G2567, Gh\_A06G0705,  
70 Gh\_D08G2564, Gh\_A05G0260) and *N. benthamiana* (BAD04852.2) were introduced into the pGADT7  
71 (Clontech). A LiCl-polyethylene glycol method was used to transfer the plasmid into yeast strain AH109  
72 (Clontech). Transformants were screened on SD-Leu-Trp plates and the interactions were tested on SD -  
73 Leu-Trp-His plates with 1mM 3-amino-1,2,4-triazole, incubating at 30 $^{\circ}$ C for 3-4 days. At least 10 individual  
74 clones for each construct were analyzed.

75 **Prokaryotic Expression and Purification of HIS Fusion Proteins.** For expression of HIS fusion proteins  
76 (HIS-HARP1, HIS-REPAT38, HIS-JAZ3, HIS-JAZ3 $\delta$ N, HIS-Venus and HIS-Venus-HARP1),  
77 the corresponding fragments were inserted into pET32a (Stratagene) with a HIS N-terminal fusion. The  
78 recombinant protein was expressed in *Escherichia coli* strain BL21 (DE3) and purified by Ni affinity column  
79 (Ni-NTA resin, Novagen). Briefly, Total proteins of *E. coli* were extracted by lysis buffer containing 50 mM

80 Tris-Cl, pH 8.0, 100 mM NaCl, 25 mM imidazole, 10% (v/v) glycerol, 0.1% (v/v) Tween 20, 1 mM  
81 phenylmethanesulfonyl fluoride (PMSF), 10  $\mu$ M MG-132 (Sigma-Aldrich) and Protease Inhibitor Cocktail,  
82 followed by centrifugation at 14,000g for 10 min at 4°C. The supernatants were loaded onto a Ni affinity  
83 column (Ni-NTA resin, Novagen), which was then washed with 3 $\times$  volumes of lysis buffer, and finally eluted  
84 with lysis buffer that contained 250 mM imidazole.

85 **Immunoblot and Pull-down Assays.** Total midgut proteins of fourth-instar larvae were extracted by 50  
86 mM Tris-HCl buffer (pH 9.0). The gut fluid, oral secretion and the total protein solutions of midgut were  
87 extracted by chloroform in equal volume and the precipitate was washed by 75% ethanol and finally  
88 dissolved in solution buffer (Tris-HCl, 10 mM, pH 8.5). Samples (10  $\mu$ g proteins per lane) were loaded onto  
89 a 15% SDS–polyacrylamide gel electrophoresis gel. Anti-HARP1 antibody (generated by Prof. Xia's lab in  
90 Xiamen University, China; dilution, 1:3,000) was used for HARP1 detection. The specificity of Anti-HARP1  
91 antibody was detected by immunoblot using the samples of wild-type and *35S:6MYC-HARP1* transgenic  
92 plants; the Anti-MYC antibody was used as positive control. The immunoblot with the Anti-HARP1 antibody  
93 shows that only the samples of the transgenic plants expressing HARP1 have a main signal band and this  
94 indicates that the Anti-HARP1 antibody is specific to bind to HARP1 proteins. (*SI Appendix*, Fig. S14).

95 To examine the indicated protein level in plants, total proteins of plant leaves were extracted by an  
96 extraction buffer (50 mM HEPES, 10 mM EDTA, 50 mM NaCl, 10% glycerol, 1% polyvinylpyrrolidone,  
97 2 mM DTT, 1 mM phenylmethylsulfonyl fluoride, 10 mM MG-132, and 1 $\times$  protease inhibitor cocktail, pH 7.5).  
98 In each sample 75  $\mu$ g proteins were used. Anti-HA-peroxidase antibody (Cat No. 12013819001, Roche;  
99 dilution, 1:2,000), anti-COI1 antibody (7) (obtained from Prof. Xie, dilution, 1:3000), anti-MYC antibody

100 (Cat No. 30602ES60, Yeasen; dilution, 1:2,000) and anti-GFP antibody (Cat No. 31003ES50, Yeasen;  
101 dilution, 1:2,000) were used to detect the HA fusion (JAZ3-HA, JAZ3 $\delta$ N-HA and JAZ3 $\delta$ C-HA), COI1, MYC  
102 fusion (6MYC-HARP1 and 6MYC-REPAT38) and GFP/GFP-HARP1 protein levels in plants, respectively.

103 To examine the interaction of JAZ3 and HARP1, total protein extracts (5 mg proteins) of *35S:JAZ $\delta$ N-HA*  
104 and *35S:JAZ $\delta$ C-HA* plant leaves were mixed with 80  $\mu$ g recombinant HIS-HARP1 in a total volume of 1  
105 ml. Ni-NTA resin (Novagen) was used to bind HIS-HARP1. After incubation for one hour at 4°C, the Ni-  
106 NTA resin was washed and eluted with imidazole. Samples were used to detect the truncated fusion  
107 proteins of JAZ3-HA by immunoblotting using anti-HA, and the anti-HIS antibody was used to detect the  
108 HIS-HARP1. To examine the expression of JAZs and HARP1 in yeast cells, the indicated co-transformed  
109 yeast cells were cultured on medium lacking Leu and Trp and subsequently transferred into YPDA liquid-  
110 medium overnight, then the total proteins were extracted. Samples were used to detect the JAZs and  
111 HARP1 by immunoblotting. Since there was a MYC epitope tag followed the GAL4 DNA-binding domain  
112 (BD) and a HA epitope tag followed the GAL4 activation domain (AD), we used Anti-HA and Anti-MYC  
113 antibody to detect the JAZs-AD and HARP1-BD respectively.

114 To examine the effect of HARP1 on JAZ3-COI1 interaction, total protein extracts of wild-type and  
115 *35S:6MYC-HARP1-1* plant leaves were mixed with 80  $\mu$ g recombinant HIS-JAZ3 or HIS-JAZ3 $\delta$ N in 1 ml  
116 and Coronatine was added to a final concentration of 50  $\mu$ M. Ni-NTA resin (Novagen) was used to bind  
117 HIS-JAZ3 and HIS-JAZ3 $\delta$ N. The anti-COI1 antibody was used to detect the COI1 level in the samples  
118 before (crude) or after pull-down. The anti-MYC antibody was used to detect 6MYC-HARP1 and the anti-  
119 HIS antibody was used to detect the truncated JAZ3 proteins (HIS-JAZ3 and HIS-JAZ3 $\delta$ N).

120 The anti-HIS, anti-HA and anti-MYC antibody were directly conjugated with horseradish peroxidase (HRP)  
121 and for anti-HARP1 and anti-COI1 antibody, a horseradish peroxidase (HRP) conjugated goat anti-mouse  
122 IgG second antibody were used to form antibody-antigen complex. SuperSignal™ West Femto Maximum  
123 Sensitivity Substrate (Thermo) (for weak signaling) and Pierce™ ECL Western Blotting Substrate (Thermo)  
124 (for strong signaling) were used to detect the HRP enzyme activity.

125 **Whole Amount Immunohistochemistry.** The three-week old *Arabidopsis* were incubated with fourth-  
126 instar larvae of *H. armigera*. The leaves after insect wounding damage were collected immediately and  
127 transferred to the FAA-fixative solution for 4 hours. The mechanically wounded leaves were used as control.  
128 Leaf samples were dehydrated through a series of graded alcohol solutions, followed by rehydration. After  
129 incubation for 2 hours with blocking buffer (1×PBS containing 0.1% Tween 20 and 1% Albumin from bovine  
130 serum BSA), samples were incubated with the primary antibody (anti-HARP1) in 4°C overnight. The  
131 samples were washed by PBST (PBS containing 0.1% tween 20) for 4 times. The HARP1 signals were  
132 visualized by Western Blue stabilized substrate for Alkaline Phosphatase (Promega) and observed under  
133 an Olympus BX63 microscope equipped with a DP73 digital camera and differential interference contrast  
134 modules.

135 **Sub-Cellular Localization of HARP1 in Plant Leaves.** To detect the translocation of prokaryotic  
136 expressed Venus-HARP1 in plant cells, the second true leaves of *Arabidopsis* were punched and soaked  
137 into the 50mM Tris-HCl buffer containing the purified HIS fusion protein of Venus-HARP1 or Venus (1  
138 mg/ml) for one hour. And then the samples were washed with wash solutions (PBS containing 0.1% Tween  
139 20 and 1% Albumin from bovine serum, BSA) for 3-4 times to removal the extra proteins adhering on the

140 leaves surface. 4,6-diamidino-2-phenylindole (DAPI) was applied for nuclear staining. Confocal laser  
141 scanning microscopy (CLSM) was performed with an Olympus FV3000 microscope equipped with a 40x  
142 dry objective (UPLSAPO40X2 NA 0.95) and 1.25x objective (PLAPON1.25X NA 0.04). Images were  
143 sequentially recorded with excitation wavelengths of 405 and 514 nm with the corresponding dichroic  
144 mirror and analyzed by Olympus cellSens (version Dimension 1.18) software.

145 For the subcellular localization of HARP1 in transgenic plants, GFP-HARP1 and GFP (used as control)  
146 were transiently expressed in *N. benthamiana* leaf cells via *Agrobacterium* infiltration. Two days later the  
147 leaf tissues were observed under a laser scanning confocal microscope (Olympus FV1000, Japan).

148 **Gene Expression Analyses.** Total RNAs from *Arabidopsis* plants or from *H. armigera* larvae were isolated  
149 by Trizol reagent (Invitrogen). About 1 µg of total RNAs was treated with 1 µl of DNase I (1 unit per µl;  
150 Fermentas) and used to prepare the first strand cDNA (Invitrogen). qRT-PCR was performed. *S18* in  
151 *Arabidopsis* (At4g09800) and actA3b (GenBank No. X97615.1) in *H. armigera* were used as internal  
152 standard for analysis of gene expressions in *Arabidopsis* and in insects, respectively. Biological triplicates  
153 with technical duplicates were performed.

154 **RNA-Seq and Transcriptome Analysis.** The third and fourth true leaves of the 16 day-old *Arabidopsis*  
155 and *35S:6MYC-HARP1* plants were mechanically wounded. After 4 h post-wounding, samples (W) are  
156 collected and the unwounded leaf samples are used as control (CK). The total RNA was extracted by Trizol  
157 reagent (Invitrogen), and library construction and sequencing were accomplished by Shanghai Personal  
158 Biotechnology Co., Ltd. Three biological replicates were performed. Briefly, sequencing libraries were  
159 prepared with the TruSeq RNA Sample Preparation Kit (Illumina) according to the manufacturer's



160 instructions. The libraries were pooled and sequenced on the Illumina Nextseq platform (High output, 2  
161 runs) with read length of 150 nt in paired end configuration. All reads can be downloaded on NCBI  
162 (SRR6668925, SRR6668926, SRR6668927, SRR6668928). Low quality sequencing reads (Q < 20, reads  
163 of N > 5%, and adaptors) were removed before analysis. The clean reads were mapped to  
164 the *Arabidopsis* genome (TAIR10) using TopHatt (8). Statistics of mapping was presented in Dataset S2.

165 HTSeq (9) was used to calculate the mapping results and DESeq (10) was used for differential gene  
166 expression analysis (fold change > 2 or < 0.5; adjusted *p*-value < 0.05; baseMean >10 in at least one  
167 sample). RPKM (Reads Per Kilo bases per Million reads) or baseMean (normalized by DESeq) was used  
168 to measure gene expression levels. Gene ontology (GO) enrichment analysis was performed with AgriGO  
169 (11). Hypergeometric tests with Yekutieli adjustment were used for the calculation of *p*-values and false  
170 discovery rates (FDRs). Terms with FDR<0.05 were considered to be enriched. Scatter diagram of the 418  
171 HARP1-affected genes was drawn by Perl package, in which gene expression levels were calculated as  
172 RKPM values.

173 **Phylogenetic Analyses.** HARP1 protein sequences were screened within 11 insect species from five  
174 families of Lepidoptera (*SI Appendix*, Table S4). The most similar protein sequences (*SI Appendix*, Table  
175 S4) from these insect species were used for further analyses. Protein sequences were aligned using the  
176 MAFFT with G-INS-i algorithm (12). Phylogenetic analysis was performed using Neighbour-Joining  
177 methods using MEGA (version 5.03) (13) by sampling 1000 bootstrap replicates.

178 **Liquid Chromatography-Mass Spectrometry and Proteomic Analyses.** To examine the variations of  
179 protein level in the OS of *H. armigera* larvae, the synchronous fourth-instar larvae of *H. armigera* were fed

180 on artificial diet and 3-week old *Arabidopsis* leaves, respectively, for one day. The OS samples were  
181 collected and sent to Shanghai Applied Protein Technology Co. Ltd. for Label free LC-MS/MS analysis.  
182 Three biological replicates were performed separately.

183 Trypsin (Promega) was used to digest the protein samples (100 µg) according to the FASP (filter-aided  
184 sample preparation) procedure (14). The peptide samples were auto-loaded into the C18- reversed phase  
185 trap column (Thermo Scientific Acclaim PepMap100, 100µm\*2cm, nanoViper C18) and separated by the  
186 C18- reversed phase analytical column (Thermo Scientific Easy Column, 10 cm long, 75 µm inner diameter,  
187 3 µm resin) with buffer A (0.1% Formic acid) for balancing and buffer B (0.1% formic acid and 84%  
188 acetonitrile) for separation. The peptides were separated at a flow rate of 300 nl/min controlled by  
189 IntelliFlow technology with a liner gradient: 0 min, 0% B; 110 min, 55% B; 115 min, 100% B; 115 to 120  
190 min, 100% B. The MS/MS experiment was performed on a Q Exactive mass spectrometer (Thermo  
191 Scientific) coupled to Easy nLC (Thermo Fisher Scientific), The Q Exactive was operated in positive ion  
192 mode for 120 min, based on a data-dependent top20 method for MS data collection which dynamically  
193 chose the most abundant precursor ions from the survey scan (300–1800 m/z)(MS<sup>1</sup> scan) for HCD  
194 fragmentation (MS<sup>2</sup> scan). The resolution for the survey scans and HCD spectra was 70,000 at m/z 200  
195 and 17,500 at m/z 200, respectively.

196 MS/MS raw data were analyzed by Maxquant (version 1.3.0.5) for label free quantitative analysis (LFQ)  
197 against with the insect protein database (including 22 insect genus) from NCBI (*SI Appendix*, Table S6)  
198 and the *H. armigera* protein database derived from the transcriptome database (15). The search  
199 parameters were: Missed cleavage, 2; enzyme, Trypsin; Fixed modification, Carbamidomethyl(C); Variable

200 modification, Oxidation(M), Acetyl (Protein N-term); Decoy database pattern, reverse; LFQ, TRUE; Peptide  
201 FDR, 0.01; Protein FDR, 0.01. The Statistics of identified peptides and proteins as well as Label-free  
202 quantitation results are listed in Dataset S1. The LFQ intensity >1.5-fold changes were defined as up-  
203 regulated peptides and proteins.

204 **Statistical Analysis.** Data were presented as means $\pm$  SD or SEM and analyzed by Student's *t* test or two-  
205 way ANOVA performed with GraphPad Prism software, that were also described in figure legends. At least  
206 three biological replicates were used to perform each of the experiments, and all the experiments were  
207 repeated for multiple times and the results were consistent.

208

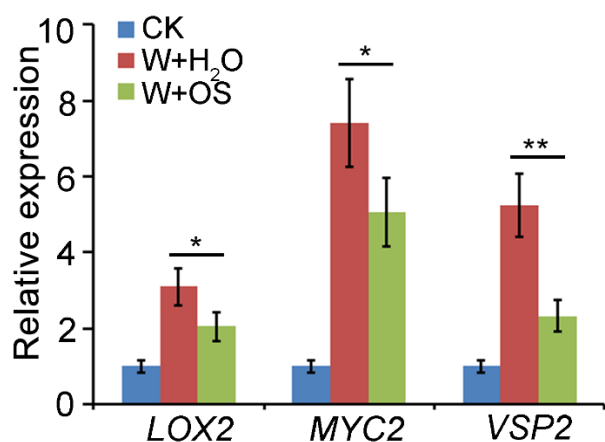

210

211 **Fig. S1.** HARP1 contributes to cotton bollworm OS on suppressing plant wounding response. The oral  
 212 secretion (OS) of *H. armigera* larvae attenuate the induction of genes upon wounding. *Arabidopsis* leaves  
 213 were wounded and painted with the double-distilled water (W+H<sub>2</sub>O) or the OS of the fourth-instar larvae  
 214 (W+OS). Thirty minutes later, leaves were collected and qRT-PCR was used to detect transcripts of the  
 215 selected genes. The expression in the unwounded leaves (CK) was set to 1. \**P*<0.05, \*\**P*<0.01. Error bars  
 216 represent ±SD (n=3 biological replicates)

217

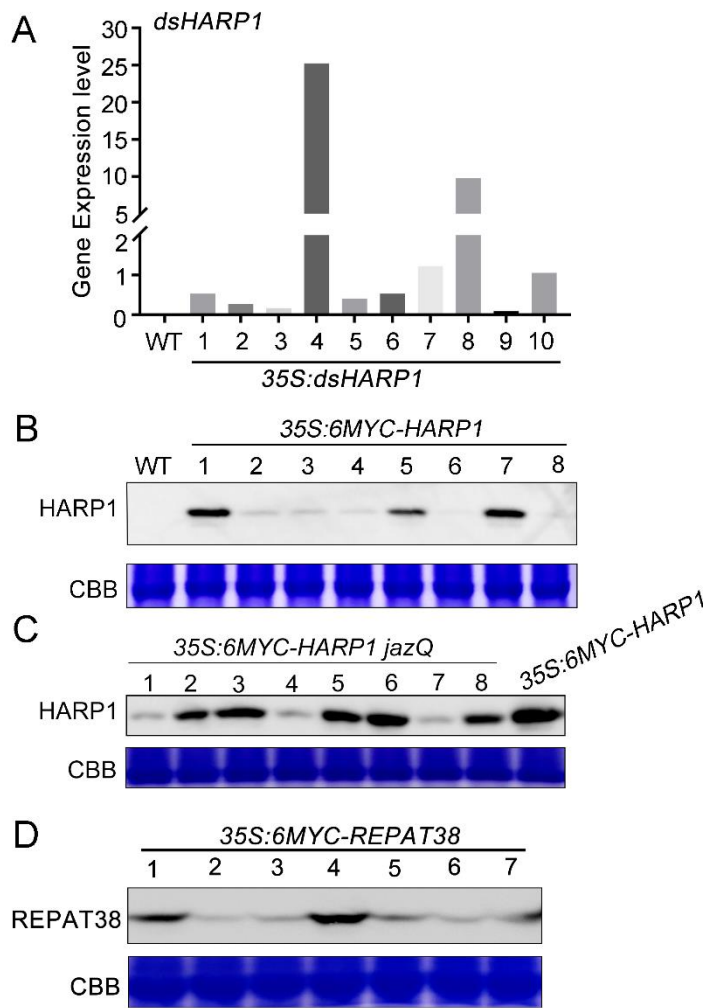

218

219 **Fig. S2.** The overexpression level detection of HARP1 and REPAT38 proteins as well as dsHARP1 in  
 220 transgenic *Arabidopsis*. (A) The expression level of dsHARP1 in transgenic plants were detected by qRT-  
 221 PCR. The *dsHARP1* expression level was normalized to the house-keeping gene S18 using  $2^{-\Delta CT}$ . (B-D)  
 222 Immunoblot detection of HARP1 and HARP1-like protein REPAT38 in transgenic plants. 6MYC-HARP1  
 223 (HARP1) in *35S:6MYC-HARP1* (B) and *35S:6MYC-HARP1 jazQ* (C), 6MYC-REPAT38 (REPAT38) in  
 224 *35S:6MYC-REPAT38* (D). The newly initiated leaves from wild-type (WT) or from T1 transgenic lines were  
 225 analyzed. 6MYC-HARP1 and 6MYC-REPAT38 in plants was detected by Anti-6MYC antibody. The amount  
 226 of total proteins in each loading was monitored with Coomassie Brilliant Blue (CBB) staining.

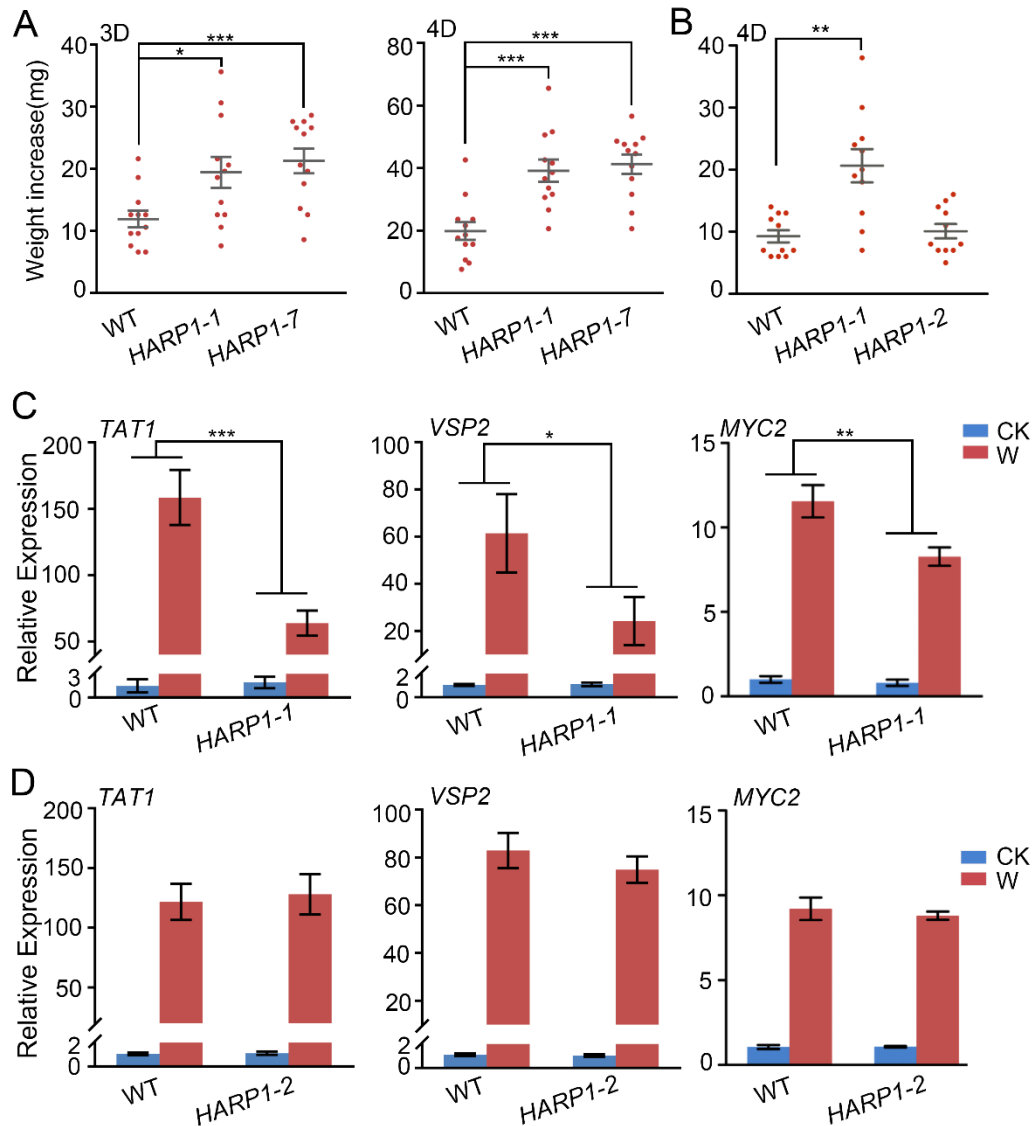

227

228 **Fig. S3.** Insect resistance and wounding responses were reduced in the plants with high expression level  
 229 of HARP1. (A and B) Cotton bollworm larvae grew faster when reared on plants highly expressing HARP1.  
 230 Third-instar larvae were fed on indicated plant leaves, Weight increases were recorded. Data were  
 231 analyzed by Student's *t*-test. \*\* $P < 0.01$ . Error bars represent  $\pm$ SEM ( $n = 12$ ). (A) Larvae were fed on WT and  
 232 two transgenic lines with high expression level of HARP1 ( $35S:6MYC-HARP1-1/HARP1-1$  and  $35S:6MYC-$   
 233  $HARP1-7/HARP1-7$ ) for 3 (left) and 4 (right) days. (B) Larvae were fed on WT and one transgenic line with  
 234 low expression level of HARP1 ( $35S:6MYC-HARP1-2/HARP1-2$ ) for 4 days. (C and D) The indicated gene  
 235 inductions were reduced in  $35S:6MYC-HARP1-1$  (C) but not in  $35S:6MYC-HARP1-2$  (D). Plant leaves  
 236 were collected 4 h after wounding (W), the unwounded leaves (CK) were used as control. The expression  
 237 in WT was set to 1. Data were analyzed by two-way ANOVA followed by multiple comparisons (Tukey test)  
 238 (\* $P < 0.05$ , \*\* $P < 0.01$ , \*\*\* $P < 0.001$ ). Error bars represent  $\pm$ SD ( $n = 3$  biological replicates). The experiments  
 239 were repeated three times and the results were consistent.

240

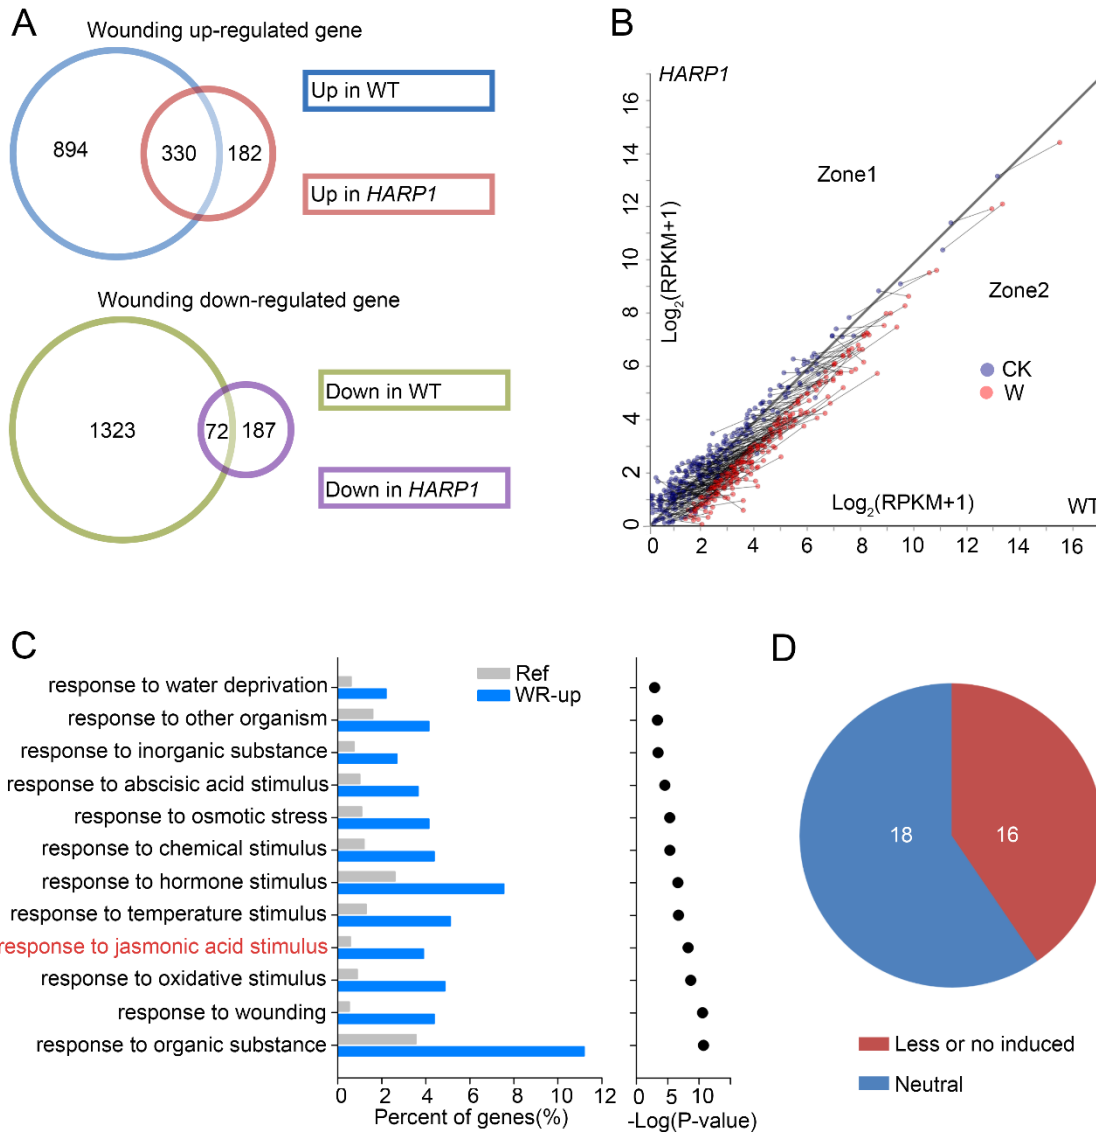

241

242 **Fig. S4.** RNA-seq analysis revealed reduced wounding response in *35S:6MYC-HARP1*. (A) The venn  
 243 diagrams of wounding up- and down- regulated genes in wild-type and *35S:6MYC-HARP1-1* (*HARP1*)  
 244 plants. The overlapped regions stand for genes up- or down-regulated both in WT and *35S:6MYC-HARP1-1*. (B)  
 245 Scatter plot analysis of the 418 genes up-regulated in wild-type but less or not induced in *35S:6MYC-*  
 246 *HARP1-1* upon wounding ( $\text{WT-Wounding}/35\text{S:HARP1-Wounding} > 2, P < 0.05$ ). The X- and Y-axis stands  
 247 for the gene expression ( $\text{Log}_2(\text{RPKM}+1)$ ) in wild-type (WT) and *35S:6MYC-HARP1-1* (*HARP1*) leaves,  
 248 respectively. Blue and red spots represent the gene expressions in unwounded (CK) and wounded (W)  
 249 plants 4 h post-treatment, respectively. The quadrant diagonal line divides the first quadrant into two parts  
 250 equally. Spots in Zone2 indicate the less induced genes upon wounding in *35S:6MYC-HARP1*. (C)  
 251 Significantly enriched GO terms of the 418 genes in zone 2 as described in (B) are indicated by blue  
 252 columns. Gray columns indicate the percentage of enrichment across the whole genome. The spots  
 253 indicate  $-\log(P\text{-value})$  by hypergeometric test, which are adjusted by Yekutieli (FDR under dependency)  
 254 multi-test. (D) The induction of JA response genes was largely suppressed in *35S:6MYC-HARP1* upon  
 255 wounding. Pie diagram analysis revealed that totally 34 (18+16) genes clustered in JA response were

256 obviously induced by wounding treatment in wild-type, among them 16 genes (red part), about 47% (16/34),  
257 were less or no induced in *35S:6MYC-HARP1* plant upon wounding. The rest 18 genes which had no  
258 significant differences between WT and *HARP1* in wounding treatment were indicated in blue (Neutral).  
259



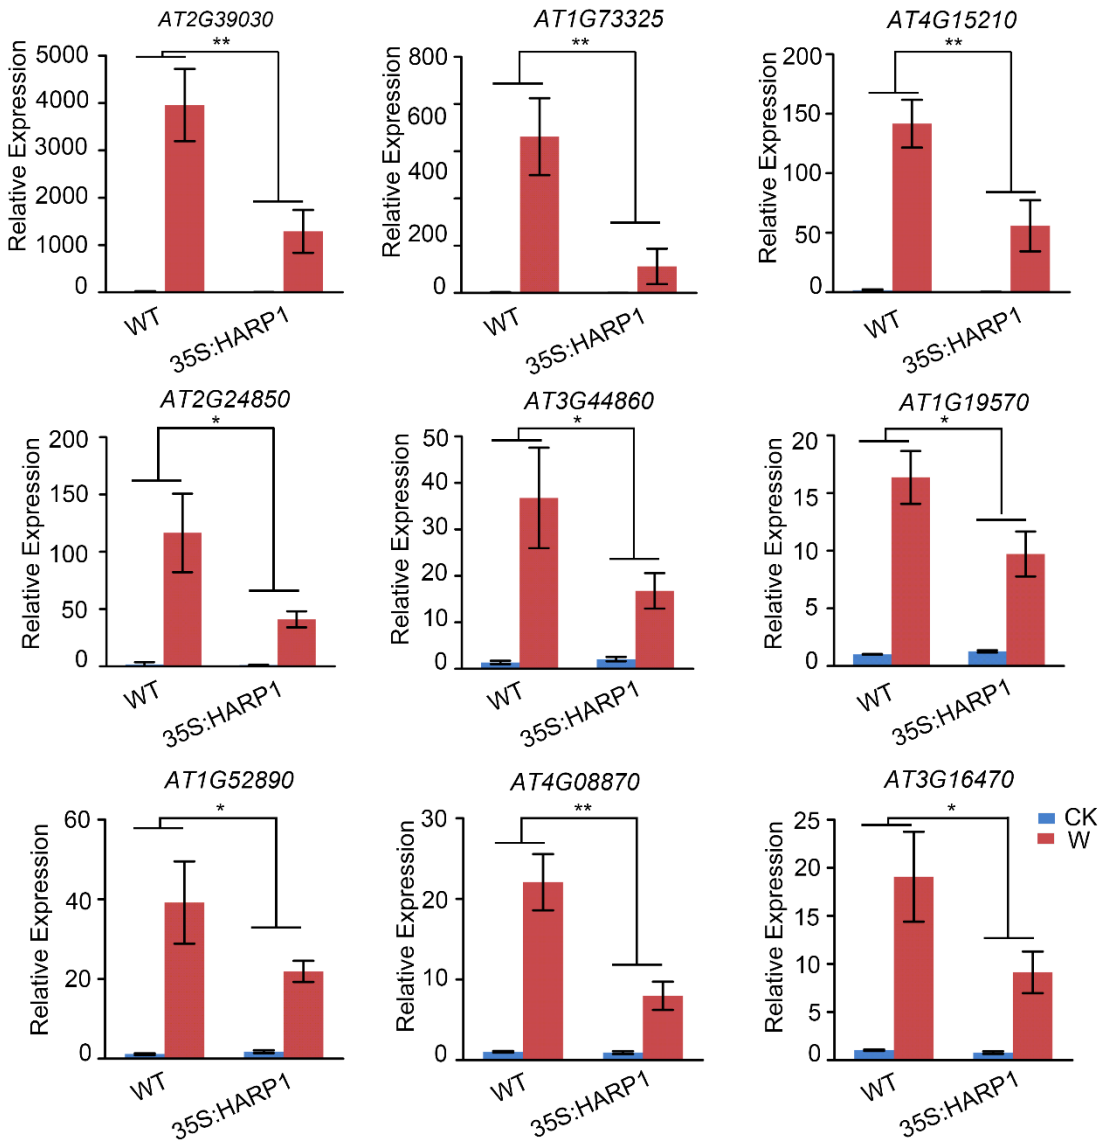

260

261 **Fig. S5.** Relative gene expressions of nine genes selected from the 418 wounding up-regulated genes as  
 262 described in Fig. 2. Wild-type (WT) and 35S:6MYC-HARP1-1 (*HARP1*) leaves were wounded; samples of  
 263 the unwounded (CK) and the wounded (W) leaves (4 H post-wounding) were investigated by qRT-PCR.  
 264 Data were analyzed by two-way ANOVA followed by multiple comparisons (Tukey test) (\* $P$ <0.05, \*\* $P$ <0.01).  
 265 Error bars represent  $\pm$ SD (n=3 biological replicates).

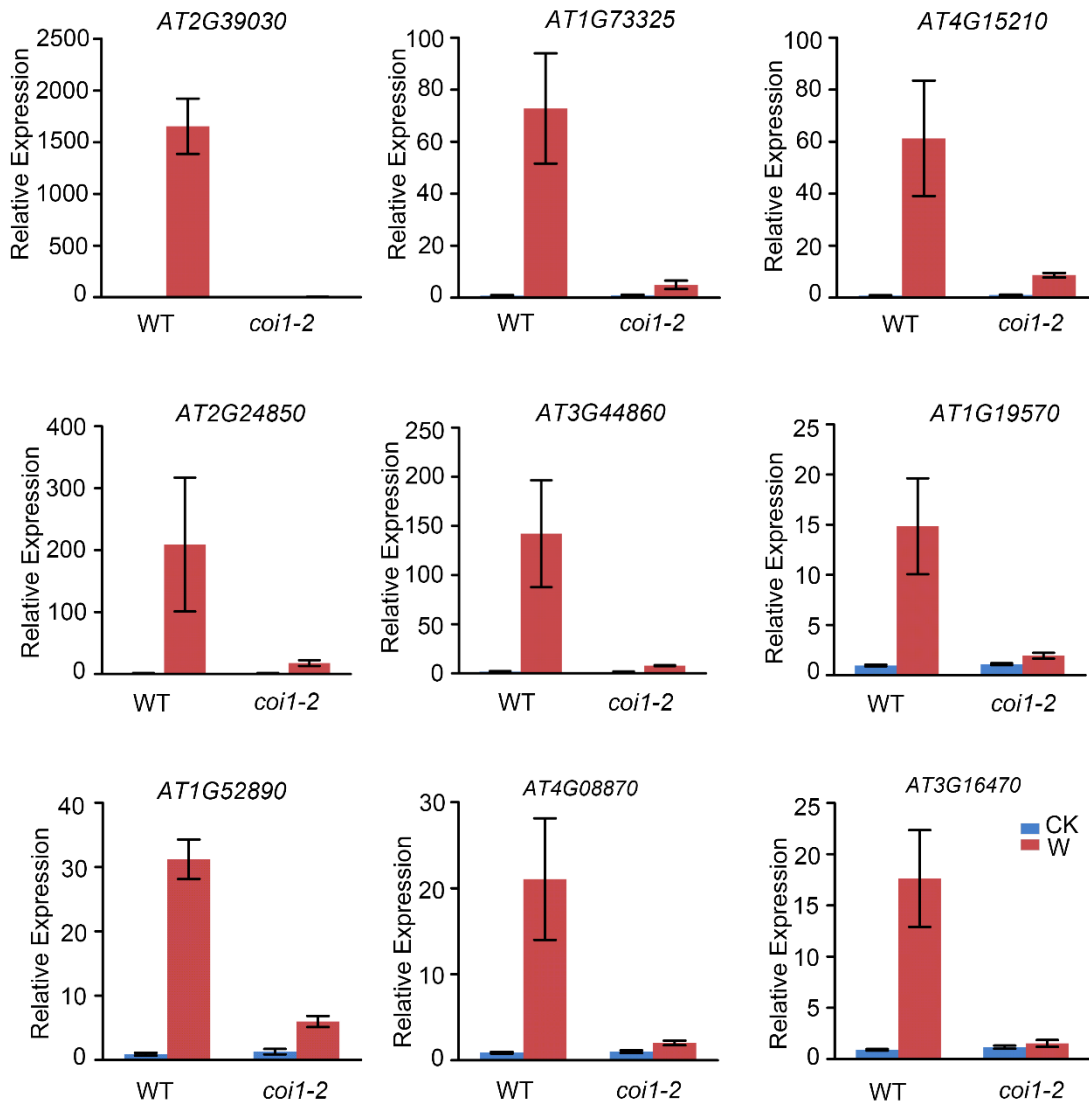

266

267 **Fig. S6.** Wounding induction of the selected genes shown in Fig. S4 is JA signal dependent. Leaves of the  
 268 wild-type (WT) and the JA insensitive mutant (*coi1-2*) plants were wounded (W) or unwounded (CK) and  
 269 samples were collected for gene expression analysis by qRT-PCR 4 H post-treatment. Error bars represent  
 270  $\pm$ SD (n=3 biological replicates).

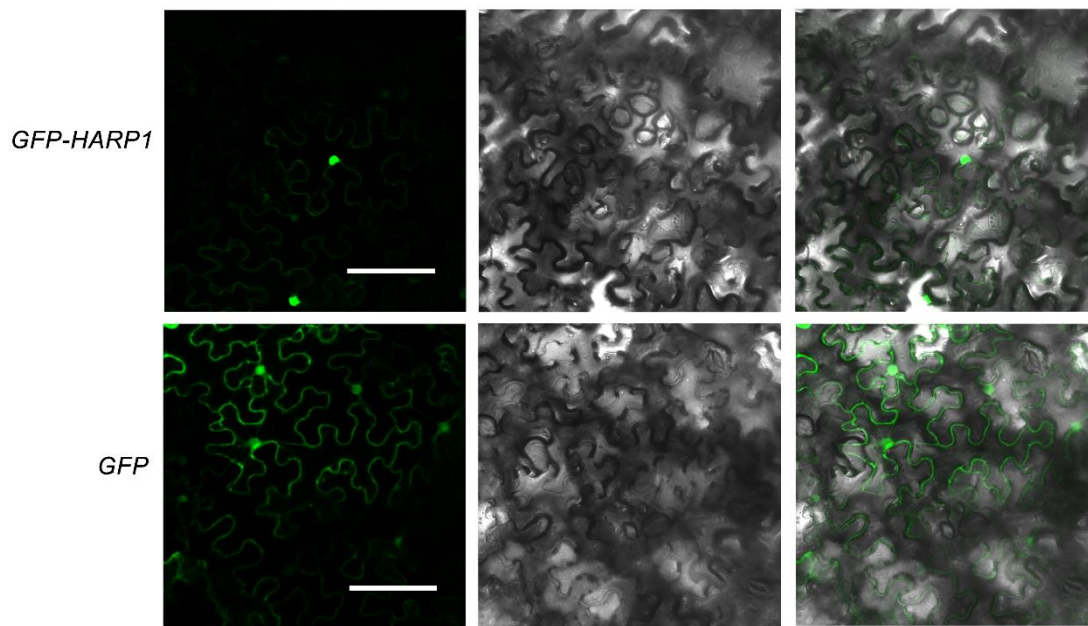

271

272 **Fig. S7.** HARP1 is mainly localized in the nucleus of *N. benthamiana* cell. *35S:GFP-HARP1* and *35S:GFP*  
273 were transiently expressed in *N. benthamiana* leaves. Confocal laser scanning microscopy was used to  
274 visualize the fluorescence. Scale bar, 100  $\mu\text{m}$ .

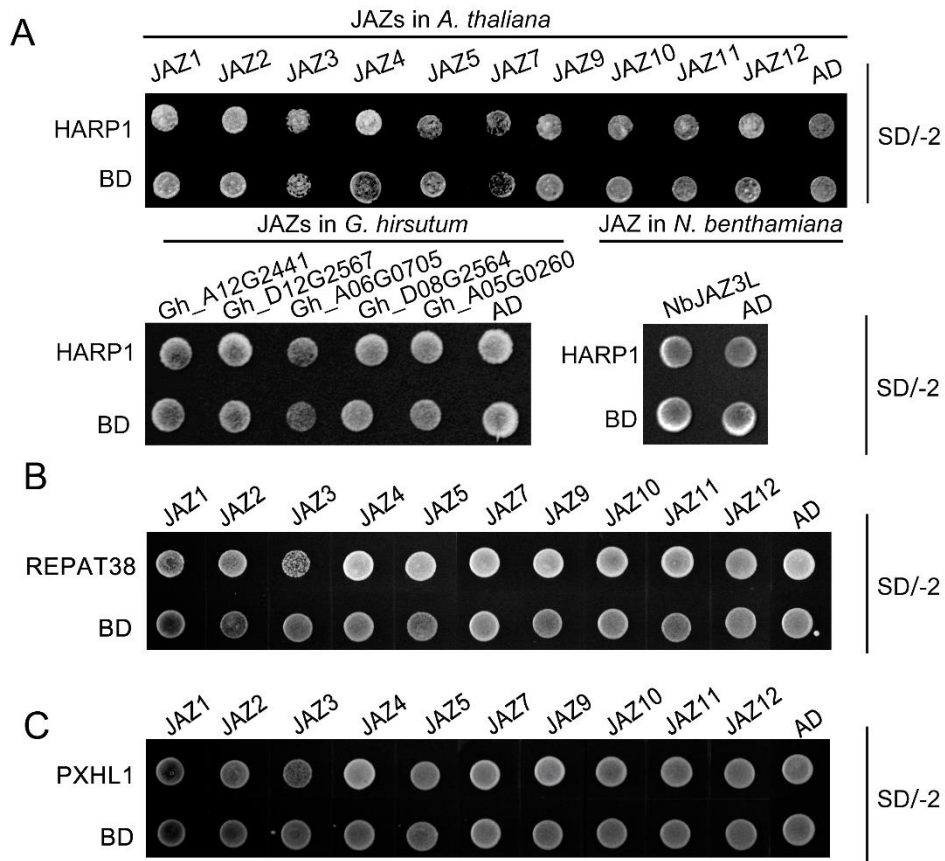

275

276 **Fig. S8.** Additional information of yeast two-hybrid assay in Fig. 3A, Fig. 5B and Fig. 6A. (A) Control growth  
 277 of yeast cells transformed with HARP1-BD and indicated JAZs-AD in Y2H assay. HARP1 was fused to  
 278 GAL4 DNA-binding domain (BD), JAZ proteins of *Arabidopsis* (*A. thaliana*), cotton (*G. hirsutum*) and  
 279 tobacco (*N. benthamiana*) were fused to GAL4 activation domain (AD), respectively. Yeast cells co-  
 280 transformed with the indicated combinations were selected and subsequently cultured on medium lacking  
 281 Leu and Trp (SD/-2). (B and C) Control growth of yeast cells transformed with REPAT38 (B) or PXHL1 (C)  
 282 and indicated JAZs of *Arabidopsis* (*A. thaliana*) in Y2H assay. REPAT38, PXHL1 was fused to GAL4 DNA-  
 283 binding domain (BD), the indicated JAZ proteins were fused to GAL4 activation domain (AD), respectively.  
 284 Yeast cells co-transformed with the indicated combinations were selected and subsequently cultured on  
 285 medium lacking Leu and Trp (SD/-2). All the co-transformed yeast cells have good growth conditions when  
 286 cultured on SD/-2 medium.

287

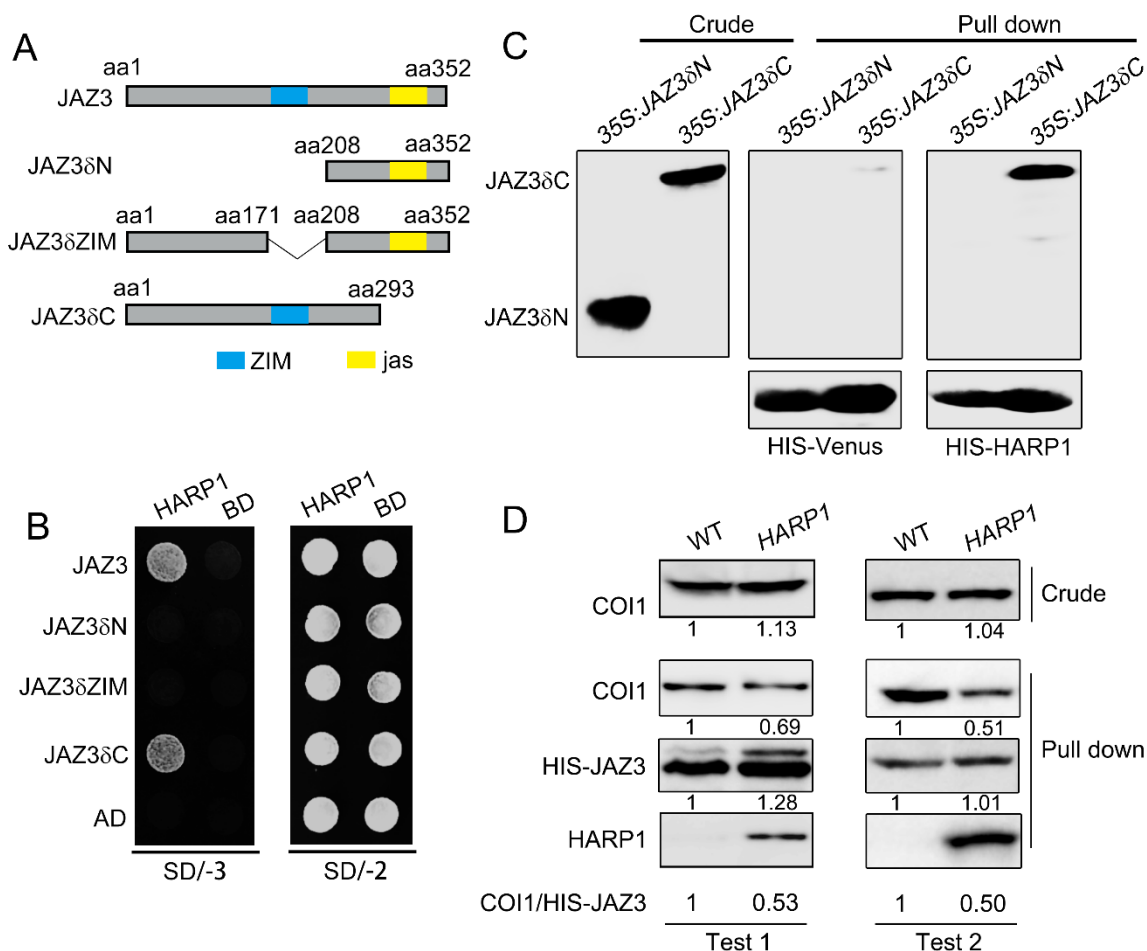

288

289 **Fig. S9.** JAZ3 N-terminal region containing ZIM domain required for interaction with HARP1. (A) Schematic  
 290 diagrams of truncated versions of JAZ3 used in Yeast two-hybrid assay. Blue and yellow box indicate ZIM  
 291 and jas domain, respectively. (B) Yeast two-hybrid assay. HARP1 was fused to GAL4 DNA-binding domain  
 292 (BD), different truncated versions of JAZ3 were fused to GAL4 activation domain (AD), respectively. Yeast  
 293 cells co-transformed with the indicated combinations were selected and subsequently cultured on medium  
 294 lacking Leu and Trp (SD/-2). Interactions were examined with yeast cells grown on medium lacking His,  
 295 Leu and Trp (SD/-3) with 1 mM 3-amino-1,2,4-triazole. (C) The pull-down assay of truncated version of  
 296 JAZ3 binding with HARP1. Recombinant HIS-HARP1 and HIS-Venus protein was incubated with total  
 297 proteins of the 35S:JAZ3 $\delta$ N-HA (35S:JAZ3 $\delta$ N) and 35S:JAZ3 $\delta$ C-HA (35S:JAZ3 $\delta$ C) plant leaves,  
 298 respectively. Anti-HA antibody was used to detect the truncated fusion proteins of JAZ3 before (Crude) or  
 299 after (Pull down) immunoprecipitation. Anti-HIS was used to detect the recombinant HIS-Venus and HIS-  
 300 HARP1 protein. Before pull down assay, JAZ3 $\delta$ N-HA (JAZ3 $\delta$ N) and JAZ3 $\delta$ C-HA (JAZ3 $\delta$ C) are both  
 301 detectable in total protein extractions of 35S:JAZ3 $\delta$ N-HA and 35S:JAZ3 $\delta$ C-HA plant leaves (Crude). After  
 302 pull down, only JAZ3 $\delta$ C-HA can be co-immunoprecipitated with HIS-HARP1 but not HIS-Venus, this means  
 303 that the ZIM domain containing N-terminal are required for JAZ3-HARP1 interaction. (D) HARP1 reduces  
 304 COI1-JAZ3 co-precipitation. Recombinant proteins of HIS-JAZ3 were incubated with total leaf proteins of  
 305 the wild-type (WT) and 35S:6MYC-HARP1-1 (HARP1) *Arabidopsis* in the presence of 50  $\mu$ M Coronatine.  
 306 Anti-COI1 antibody was used to detect COI1 level before (Crude) or after (Pull down) immunoprecipitation.

307 Anti-MYC antibody was used to detect the 6MYC-HARP1 (HARP1) and Anti-HIS antibody was used to  
308 detect HIS-JAZ3. Band intensity was quantified by ImageJ and was shown under each blot. The intensity  
309 of the wild-type (WT) sample was set to 1. The relative COI1/HIS-JAZ3 ratio was listed in the bottom.

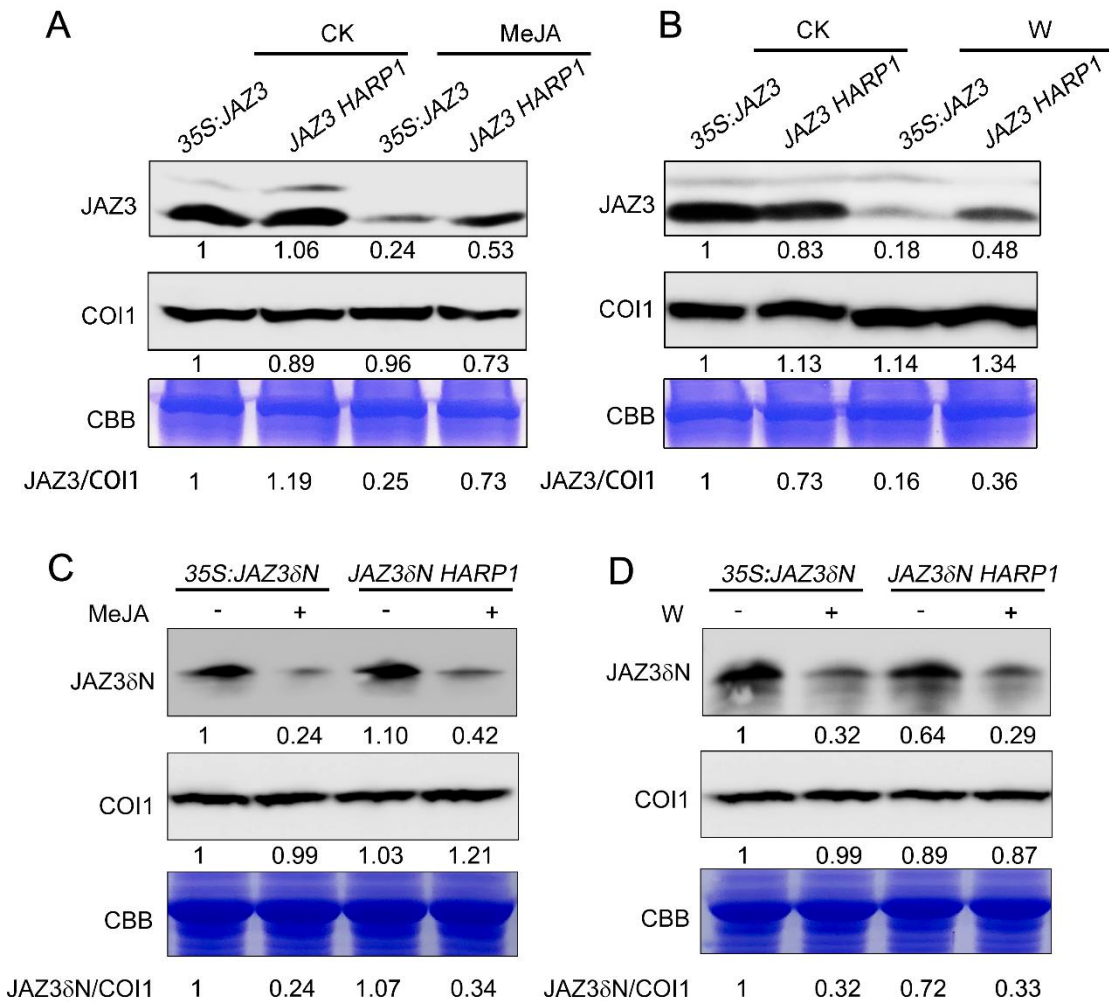

311

312 **Fig. S10.** The JAZ3-HA (JAZ3) but not JAZ3δN-HA (JAZ3δN) is more stable with the existence of HARP1  
 313 post MeJA or wounding treatment. (A and B) HARP1 increase JAZ3-HA (JAZ3) accumulation after 50 μM  
 314 MeJA or wounding treatment. The plant leaves were collected 45 min post-MeJA (MeJA) (A) or post-  
 315 wounding (W) (B) treatment, the unwounded plant leaves (CK) were used as control. Anti-HA antibody  
 316 was used to detect JAZ3-HA (JAZ3). Anti-COI1 antibody was used to detect COI1. (C and D) HARP1 had  
 317 no influence on the degradation of JAZ3δN. The plant leaves of 35S:JAZ3δN-HA (35S:JAZ3δN) and  
 318 35S:JAZ3δN-HA 35S:6MYC-HARP1 (JAZ3δN HARP1) were treated with MeJA (50 μM) (C) or with  
 319 wounding (D), samples were harvested 45 min post-treatment. Anti-HA and anti-COI1 antibody were used  
 320 to detect JAZ3δN-HA (JAZ3δN) and COI1 respectively in plants. The experiments in (C) and (D) were  
 321 repeated twice and the results were consistent. The band intensity was quantified by ImageJ and was  
 322 shown under each blot. The intensity of untreated 35S:JAZ3-HA or 35S:JAZ3δN-HA was set to 1. The  
 323 relative JAZ3/COI1 and JAZ3δN/COI1 ratios were listed in the bottom.

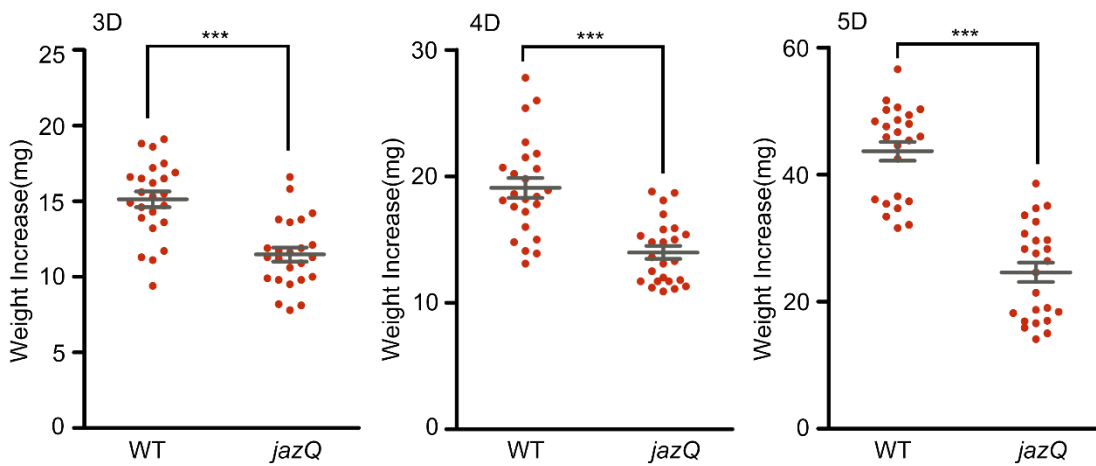

324

325 **Fig. S11.** The growth of *H. armigera* larvae fed with *jazQ* plants was inhibited compared to those fed with  
 326 wild-type. The third-instar larvae of *H. armigera* were fed with leaves of the wild-type (WT) and the *jazQ*  
 327 plants for 3, 4 and 5 days. The larval weight was recorded. Data were analyzed by Student's *t*-test.  
 328 \*\*\* $P < 0.001$ . Error bars represent  $\pm$ SEM (n=24). The experiments were repeated for three times and the  
 329 results were consistent.



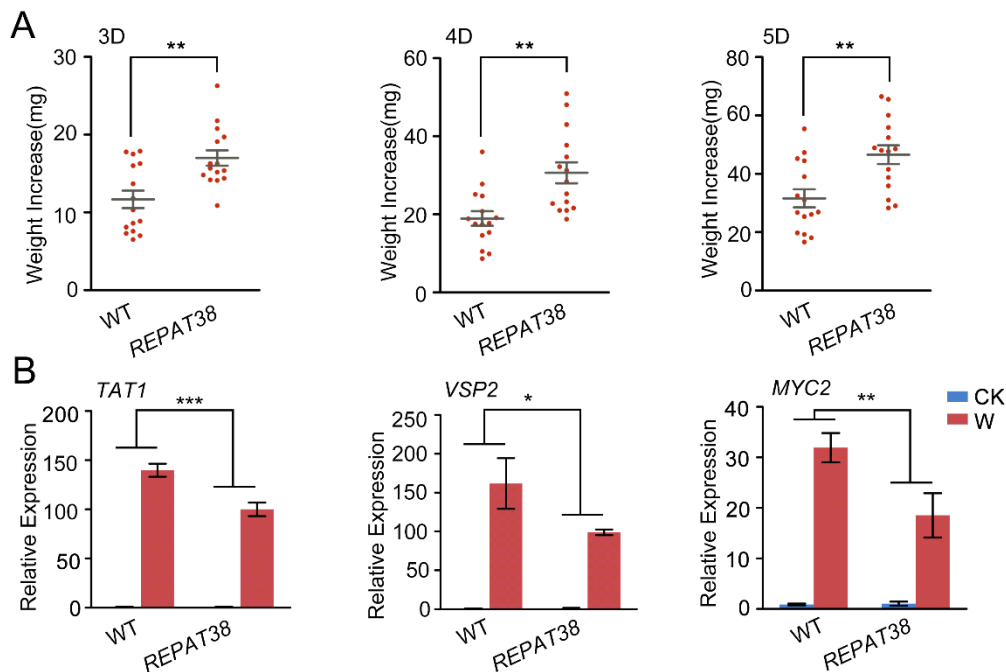

330

331

332

333

334

335

336

337

338

339

**Fig. S12.** HARP1-like proteins have similar function as effectors. (A) *H. armigera* larvae grew faster in *35S:6MYC-REPAT38*. The later stage of second instar larvae were fed on wild-type (WT) and *35S:6MYC-REPAT38* (*REPAT38*) leaves for indicated days, larval weight was recorded. Data were analyzed by Student's *t*-test. \*\* $P < 0.01$ . Error bars represent  $\pm$ SEM ( $n = 15$ ). (B) Gene inductions were reduced in *35S:6MYC-REPAT38* (*REPAT38*) than in wild-type (WT) leaves upon wounding. Gene expressions in the unwounded (CK) and the wounded (W) plants were detected by qRT-PCR 2 h post-treatment (W). Data were analyzed by two-way ANOVA followed by multiple comparisons (Tukey test). (\* $P < 0.05$ , \*\* $P < 0.01$ , \*\*\* $P < 0.001$ ). Error bars represent  $\pm$ SD ( $n = 3$  biological replicates). All the experiments were repeated three times and the results were consistent.

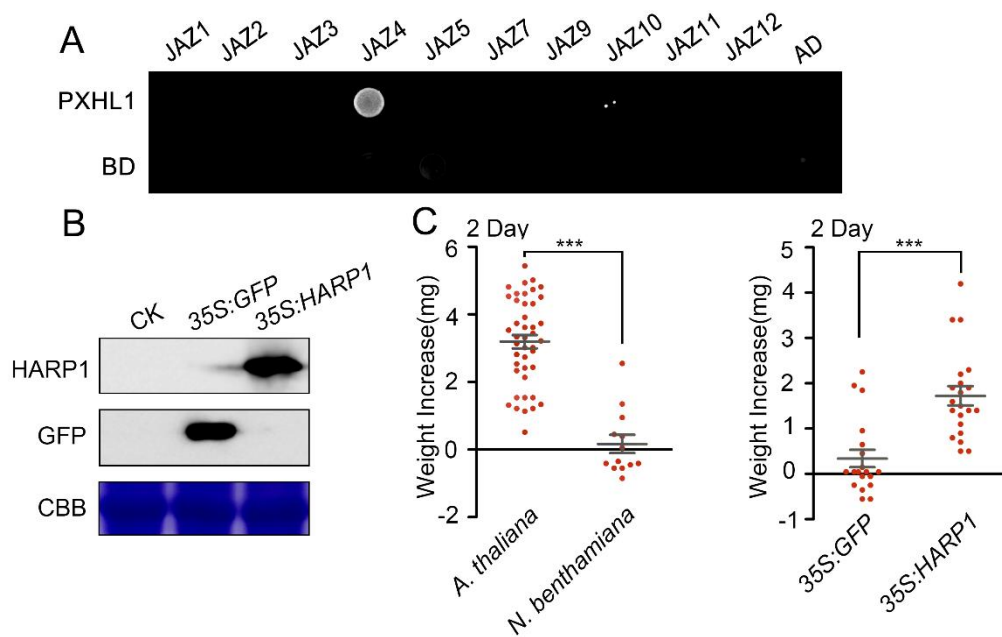

340

341 **Fig. S13.** HARP1 effector contributes to insect adaptation to plant host. (A) Yeast two-hybrid assay. PXHL1  
 342 was fused to GAL4 DNA-binding domain (BD) and the indicated JAZs were fused to GAL-activation domain  
 343 (AD), respectively. Interactions were examined with 1 mM 3-amino-1,2,4-triazole. PXHL1 did not interact  
 344 with JAZs in yeast except JAZ4. (B) Immunoblot assay of GFP and 6MYC-HARP1 (HARP1) transiently  
 345 expressed in *N. benthamiana* leaves driven by 35S promoter. Anti-GFP and anti-MYC were used to detect  
 346 GFP and HARP1, respectively. (C) *P. xylostella* larvae gained more weight increase on host (*A. thaliana*)  
 347 than on non-host (*N. benthamiana*) plants (left), and on HARP1-expressed than on GFP-expressed non-  
 348 host plants (right). HARP1 or GFP (as control) were transiently expressed, and leaves were used for  
 349 feeding. Data were analyzed by Student's *t*-test. \*\*\* $P < 0.001$ . Error bars represent  $\pm$ SEM (n=20-50). The  
 350 experiments were repeated twice and the results were consistent.

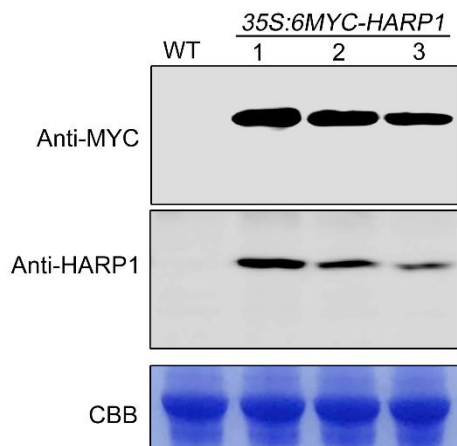

351

352 **Fig. S14.** The specificity of Anti-HARP1 antibody was detected. The wild-type (WT) and the indicated lines  
 353 of *35S:6MYC-HARP1* plants were used. Proteins of MYC-HARP1 in plants were detected by Anti-MYC  
 354 antibody and Anti-HARP1 antibody respectively. The immunoblot with the Anti-HARP1 antibody shows  
 355 that only the samples of the transgenic plants expressing HARP1 have a main signal band and this  
 356 indicates that the Anti-HARP1 antibody is specific to bind to HARP1 proteins.

357

358 Supplementary Tables:

359 **Table S1.** The induced proteins (excludes digestive enzymes from *H. armigera* oral secretion when fed on  
 360 *Arabidopsis* compared to those fed on artificial diet.

| Protein IDs         | Annotation                                            | Signals     |             | Relative content (Col-0/AD) |
|---------------------|-------------------------------------------------------|-------------|-------------|-----------------------------|
|                     |                                                       | AD          | Col-0       |                             |
| comp83964_c0_seq5*  | chitin binding PM protein                             | 1083540000  | 7182233333  | 6.628489334                 |
| comp83964_c0_seq3*  | chitin deacetylase 5b                                 | 122973333.3 | 791316666.7 | 6.434863929                 |
| comp86604_c0_seq2*  | protein Skeletor                                      | 160175000   | 655916666.7 | 4.09500026                  |
| ADX96001.1          | Small heat shock protein 19.9                         | 27852000    | 67363333.33 | 2.418617454                 |
| ADV60539.1          | Ala-tRNA synthetase                                   | 4465000     | 10671000    | 2.389921613                 |
| ABK29472.1          | HMG176                                                | 3521400     | 8253400     | 2.343783722                 |
| AKD49099.1          | Chitin deacetylase 17                                 | 33489000    | 73049666.67 | 2.181303314                 |
| comp82363_c0_seq11* | HMG176                                                | 2793800     | 5986700     | 2.142852029                 |
| comp87582_c0_seq1*  | putative gram negative bacteria-binding protein       | 241293333.3 | 510170000   | 2.114314528                 |
| comp84499_c0_seq1*  | ZZ-type zinc finger-containing protein 3-like         | 32458500    | 64800333.33 | 1.996405667                 |
| comp80008_c0_seq1*  | probable salivary secreted peptide-like               | 65417000    | 123245333.3 | 1.883995495                 |
| comp89199_c0_seq3*  | multiple epidermal growth factor-like domains protein | 7142950     | 13273966.67 | 1.858331175                 |
| KPI95249.1          | Talin-1                                               | 16028500    | 29485000    | 1.839535827                 |
| XP_013165576.1      | glycerol-3-phosphate acyltransferase 1                | 58966000    | 104119000   | 1.765746362                 |
| comp84473_c1_seq1   | chlorophyllide A binding protein                      | 84705666.67 | 147770000   | 1.744511                    |
| comp84473_c1_seq3*  | chlorophyllide A binding protein                      | 107102333.3 | 175706666.7 | 1.640549382                 |

361 The fourth-instar larvae were fed with artificial diet (AD) or *Arabidopsis* (Col-0) for one day, the OS were  
 362 collected and analyzed by LC-MS. HARP1 is shown in red. \*indicated that the data were obtained from  
 363 Xiong et al. BMC Genomics (2015) 16: 321. <https://doi.org/10.1186/s12864-015-1509-1> and the rest were  
 364 obtained from NCBI.

365 **Table S2.** HARP1 is similar to R-like/venom protein.

| <b>Species</b>                    | <b>Accession</b> | <b>Identities</b> | <b>Query cover</b> |
|-----------------------------------|------------------|-------------------|--------------------|
| <i>Nasonia vitripennis</i>        | NP_001155164.1   | 28%               | 79%                |
| <i>Trichomalopsis sarcophagae</i> | OXU27876.1       | 30%               | 68%                |
| <i>Pristhesancus plagipennis</i>  | AQM58365.1       | 29%               | 96%                |

366

367 **Table S3.** Thirteen selected genes with less induction upon wounding based on RNA-seq data. qRT-PCR  
 368 analysis (Fig. S4) further conformed that nine of these genes obviously less induced in *35S:6MYC-HARP1-*  
 369 *1* than in wild-type (shown in red color).

| Gene      | Name       | Annotation                                                                                                   |
|-----------|------------|--------------------------------------------------------------------------------------------------------------|
| AT1G19570 | DHAR5      | response to jasmonic acid, dehydroascorbate reductase                                                        |
| AT1G52890 | ANAC19     | a NAC transcription factor                                                                                   |
| AT1G73325 | --         | Kunitz family trypsin and protease inhibitor protein                                                         |
| AT2G24850 | TAT3       | biosynthetic process, cellular amino acid metabolic process, response to jasmonic acid, response to wounding |
| AT2G39030 | NATA1      | L-ornithine N5-acetyltransferase NATA1, response to jasmonic acid                                            |
| AT3G16470 | JAL35,     | response to wounding, response to jasmonic acid                                                              |
| AT3G44860 | FAMT       | a farnesoic acid carboxyl-O-methyltransferase                                                                |
| AT4G08870 | ARGAH2     | Involved in the defence response to <i>B.cinerea</i>                                                         |
| AT4G15210 | BMV1, RAM1 | response to herbivore                                                                                        |
| AT4G30460 | --         | glycine-rich protein                                                                                         |
| AT5G05600 | --         | cellular response to toxic substance, flavonoid biosynthetic process, oxidation-reduction process,           |
| AT5G20230 | BCB        | response to oxidative stress, response to wounding                                                           |
| AT5G47330 | --         | palmitoyl-(protein) hydrolase activity                                                                       |

370

371 **Table S4.** The HARP1-like proteins in Lepidoptera insects.

| Species                      | Family      | Database                                    | Accession Number           | Length (aa) | Score | Identity |
|------------------------------|-------------|---------------------------------------------|----------------------------|-------------|-------|----------|
| <i>Helicoverpa armigera</i>  | Noctuidae   | ha_unigene*                                 | comp80008_c0_seq1* (HARP1) | 122         | --    | --       |
| <i>Heliothis virescens</i>   | Noctuidae   | NCBI nr                                     | PCG70847.1                 | 121         | 206   | 92%      |
| <i>Agrotis ipsilon</i>       | Noctuidae   | Obtained from Prof. Zhan (szhan@sibs.ac.cn) |                            | 125         | 155   | 67%      |
| <i>Spodoptera exigua</i>     | Noctuidae   | NCBI nr                                     | AFH57158.1 (REPAT38)       | 121         | 188   | 83%      |
| <i>Spodoptera frugiperda</i> | Noctuidae   | NCBI EST                                    | FP350599.1                 | 121         | 210   | 83%      |
| <i>Mamestra configurata</i>  | Noctuidae   | NCBI nr                                     | AEA76315.1                 | 123         | 154   | 63%      |
| <i>Trichoplusia ni</i>       | Noctuidae   | NCBI EST                                    | FF375809.1                 | 121         | 121   | 60%      |
| <i>Hyphantria cunea</i>      | Erebidae    | Obtained from Prof. Zhan (szhan@sibs.ac.cn) |                            | 118         | 129   | 53%      |
| <i>Bombyx mori</i>           | Bombycidae  | NCBI nr                                     | XP_004925327.1             | 118         | 112   | 50%      |
| <i>Manduca sexta</i>         | Sphingidae  | NCBI EST                                    | GR919303.1                 | 118         | 105   | 43%      |
| <i>Plutella xylostella</i>   | Plutellidae | NCBI EST                                    | XP_011548876.1             | 116         | 83.2  | 41%      |

372 \* The HARP1 sequence information was obtained from Xiong et al. BMC Genomics (2015) 16: 321.  
 373 <https://doi.org/10.1186/s12864-015-1509-1>.

**Table S5.** Primers used in this investigation.

| <b>Gene</b>      | <b>Primer Sequence (5'-3')</b>                     | <b>Purpose</b> |
|------------------|----------------------------------------------------|----------------|
| <b>HARP1</b>     | CGAACGCAGTGCAATATCAG<br>GGCTGATGTCAGTCTGATGG       | qRT-PCR        |
| <b>actA3b</b>    | AAGTTGCTGCGCTGGTAGTAG<br>AGTTCGTAGGACTTCTCCAGG     | qRT-PCR        |
| <b>S18</b>       | CCAGCGATCGTTTATTGCTT<br>AGTCTTTCCTCTGCGACCAG       | qRT-PCR        |
| <b>TAT1</b>      | CCCTCAAAGACGTCAATGGT<br>ACACGACACGACAAGTCCAA       | qRT-PCR        |
| <b>VSP2</b>      | ACCCTCCTCTCTAGTATTCCC<br>ACTTGACACCACTTGCCTCA      | qRT-PCR        |
| <b>MYC2</b>      | CAAGGAGGAGTGTTTGGGATGC<br>GTCGAAAAATTAAGTTCTCGGGAG | qRT-PCR        |
| <b>LOX2</b>      | TTGGTGTGGTAACTACGATTGC<br>CACCAGCTCCAGCTCTATTCTT   | qRT-PCR        |
| <b>GhHIS3</b>    | CGGTGGTGTGAAGAAGCCCTAT<br>AATTTACGAACAAGCCTCTGGAA  | qRT-PCR        |
| <b>AT2G39030</b> | CCCCCTTTCTTGAGACGCAT<br>CACCCAACCTTCACTGCTTGC      | qRT-PCR        |
| <b>AT1G73325</b> | CCGGTTCAGTCCAATGTCCA<br>CACACTTTGGAGTCAGGGCA       | qRT-PCR        |
| <b>AT4G15210</b> | GCGTTGATGGCGTTATGGTC<br>GACATCGCGAACCCATTGTG       | qRT-PCR        |
| <b>AT2G24850</b> | CGGATGAGAATACCGTCGCA<br>ATGGATCCGAGCGTGATCAC       | qRT-PCR        |
| <b>AT3G44860</b> | TTCACCGCGGTACAAACCTT                               | qRT-PCR        |



|                             |                                                                    |                           |
|-----------------------------|--------------------------------------------------------------------|---------------------------|
|                             | TGTTCCACACAAGCGAGTCA                                               |                           |
| <b>AT1G19570</b>            | ATCGACGACAAGTGGGTGAC<br>GGAAACTCTTTCTCCGGCGA                       | qRT-PCR                   |
| <b>AT1G52890</b>            | ACCGAACAGAAAACCGGGTT<br>TTTGAGCTAACTCGCCCGAG                       | qRT-PCR                   |
| <b>AT4G08870</b>            | TCATGGAAGGTGGCTATGCG<br>CTCCTGGTTCGAAGTGGGAC                       | qRT-PCR                   |
| <b>AT3G16470</b>            | CCGTGTCGGGCTACTATGAC<br>GGCGCAACATTGACTCCAAG                       | qRT-PCR                   |
| <b>Gh_Sca005135G0<br/>1</b> | CCATCGTCCTTTTCGT<br>ACCGTTGTTGTTTCGC                               | qRT-PCR                   |
| <b>Gh_A10G2353</b>          | ATGAAAACCACAACAGTTTCGG<br>AACATGAACTACTTGTGAATC                    | qRT-PCR                   |
| <b>Gh_D11G1335</b>          | GGCAAAGATGGAGAGA<br>GTAGGGGGACGAACAA                               | qRT-PCR                   |
| <b>HARP1</b>                | CGGGATCCATGAAGAGCCTTATCCTCG<br>CGAGCTCTTATCGGCCCCAGATTTTC          | Pull down                 |
| <b>JAZ3</b>                 | CCGGAATTCATGGAGAGAGATTTTCTCGG<br>ACGCGTCGACTTAGGTTGCAGAGCTGAGAG    | Pull down                 |
| <b>JAZ3δN</b>               | CCGGAATTCATGGGTTTCTCTATGCCTCAA<br>ACGCGTCGACTTAGGTTGCAGAGCTGAGAG   | Pull down                 |
| <b>REPAT38</b>              | GGAATTCATGAAGAGTCTGATTCTGGTTGC<br>CCCAAGCTTTTAACGACCCCAAATCTCAACAC | Prokaryotic<br>expression |
| <b>Venus</b>                | CGGGATCCATGGTAGATCTGACTAGTAAAG<br>CGAGCTCTTATTTGTATAGTTCATCCATGC   | Prokaryotic<br>expression |
| <b>Venus-HARP1</b>          | CGAGGCAGCTAGATCCACCATGAACCCTGCCTTCA<br>GGGCC                       | Prokaryotic<br>expression |

|                                 |                                                                       |           |
|---------------------------------|-----------------------------------------------------------------------|-----------|
|                                 | CCCAAGCTTTTATCGGCCCCAGATTTCGA                                         |           |
| <b>HARP1</b>                    | GGAATTCATGAACCCTGCCTTCAGGGCC<br>CGGGATCCGATCATGTAGTAGTAGCCCC          | Y2H       |
| <b>REPAT38</b>                  | GGAATTCATGGCCTTCAGAGCTAACCTT<br>CGGGATCCTTAACGACCCCAAATCTCAAC         | Y2H       |
| <b>PXHL1</b>                    | CGGAATTCATGGTGGTCAAGACCCCGCTCACCC<br>ACGCGTCGACTCAGCGTCCGTAGATCACCACA | Y2H       |
| <b>JAZ5</b>                     | CGGAATTCATGTCGTGAGCAATGAAAATG<br>CGGGATCCCTATAGCCTTAGATCGAGAT         | Y2H       |
| <b>Gh_A12G2441</b>              | CGGAATTCATGGAGAGAGATTTTATCGGTT<br>CGGGATCCTTAATTGATGGCTTGTAAGGA       | Y2H       |
| <b>Gh_D12G2567</b>              | CGGAATTCATGGAGAGAGATTTTCTCGGTTT<br>CGGGATCCTTAATTGATGGCTTGTAAGGA      | Y2H       |
| <b>Gh_A06G0705</b>              | CGGAATTCATGAATATGTCGTGTTACCCGG<br>CGGGATCCCTACGGAGATTGAGCAGCCAAA      | Y2H       |
| <b>Gh_D08G2564</b>              | GGAATTCATATGATGTTTGGTTCACCCGAGAAA<br>TCCCCCGGGCTACTGCAGTGATTCAACAGCTA | Y2H       |
| <b>Gh_A05G0260</b>              | CGGAATTCATGTCGTCTTGCTCGGAATCTA<br>CGGGATCCCTATGGTGATTGAGCAGCCAAA      | Y2H       |
| <b>NbJAZ3L<br/>(BAD04852.2)</b> | GGAATTCATGGAGAGAGATTTTATGGGTT<br>TCCCCCGGGTTACGTCTCCTTGACCAAATTG      | Y2H       |
| <b>HARP1</b>                    | TCCCCCGGGATGAACCCTGCCTTCAGGGCC<br>ACGCGTCGACTCGGCCCCAGATTTTCGATCA     | Transgene |
| <b>REPAT38</b>                  | CGGGATCCATGGCCTTCAGAGCTAACCTT<br>ACGCGTCGACTTAACGACCCCAAATCTCA        | Transgene |
| <b>GFP-HARP1</b>                | CGGGATCCATGAACCCTGCCTTCAGGGCC<br>ACGCGTCGACTTATCGGCCCCAGATTTTC        | Transgene |

375 **Table S6.** The insect protein database information used in proteomic analyses.

| <b>Order</b> | <b>Family</b>   | <b>Genus</b> | <b>Protein Number</b> |
|--------------|-----------------|--------------|-----------------------|
| Lepidoptera  | Pieridae        | Pieris       | 620                   |
| Lepidoptera  | Noctuidae       | Helicoverpa  | 39899                 |
| Lepidoptera  | Papilionidae    | Papilio      | 4614                  |
| Lepidoptera  | Nymphalidae     | Danaus       | 16409                 |
| Lepidoptera  | Bombycidae      | Bombyx       | 17430                 |
| Coleoptera   | Tenebrionidae   | Tribolium    | 21815                 |
| Coleoptera   | Curculionidae   | Dendroctonus | 23845                 |
| Hymenoptera  | Formicidae      | Solenopsis   | 14754                 |
| Hymenoptera  | Formicidae      | Camponotus   | 15848                 |
| Hymenoptera  | Formicidae      | Acromyrmex   | 13982                 |
| Hymenoptera  | Apidae          | Apis         | 21088                 |
| Hymenoptera  | Apidae          | Bombus       | 20815                 |
| Hymenoptera  | Pteromalidae    | Nasonia      | 13861                 |
| Diptera      | Culicidae       | Aedes        | 19131                 |
| Diptera      | Culicidae       | Culex        | 22209                 |
| Diptera      | Ceratopogonidae | Culicoides   | 690                   |
| Diptera      | Psychodidae     | Phlebotomus  | 747                   |
| Diptera      | Tephritidae     | Ceratitis    | 18958                 |
| Diptera      | Drosophilidae   | Drosophila   | 237741                |
| Diptera      | Culicidae       | Anopheles    | 35530                 |
| Diptera      | Muscidae        | Musca        | 16771                 |
| Orthoptera   | Acrididae       | Locusta      | 647                   |
| Orthoptera   | Acrididae       | Schistocerca | 238                   |

376

377

378 **Other Supplementary Material for this manuscript includes the following:**

379 **Movie S1.** Oral secretion collection.

380 **Dataset S1.** Proteomic data of *H. armigera* oral secretion.

381 **Dataset S2.** RNA-seq analysis of differently expressed genes in the wild-type and *35S:6MYC-HARP1*  
382 plant response to wounding.

383

384

## 385 **References**

- 386 1. Ma D, *et al.* (2016) Genetic basis for glandular trichome formation in cotton. *Nat Commun* 7:10456.
- 387 2. Xie DX, Feys BF, James S, Nieto-Rostro M, & Turner JG (1998) COI1: an Arabidopsis gene required  
388 for jasmonate-regulated defense and fertility. *Science* 280(5366):1091-1094.
- 389 3. Campos ML, *et al.* (2016) Rewiring of jasmonate and phytochrome B signalling uncouples plant growth-  
390 defense tradeoffs. *Nat Commun* 7:12570.
- 391 4. Mao YB, *et al.* (2017) Jasmonate response decay and defense metabolite accumulation contributes to  
392 age-regulated dynamics of plant insect resistance. *Nat Commun* 8:13925.
- 393 5. Mao YB, *et al.* (2007) Silencing a cotton bollworm P450 monooxygenase gene by plant-mediated RNAi  
394 impairs larval tolerance of gossypol. *Nat Biotechnol* 25(11):1307-1313.
- 395 6. Clough SJ & Bent AF (1998) Floral dip: a simplified method for Agrobacterium-mediated transformation  
396 of Arabidopsis thaliana. *Plant J* 16(6):735-743.
- 397 7. Xu L, *et al.* (2002) The SCF(COI1) ubiquitin-ligase complexes are required for jasmonate response in  
398 Arabidopsis. *Plant Cell* 14(8):1919-1935.
- 399 8. Trapnell C, Pachter L, & Salzberg SL (2009) TopHat: discovering splice junctions with RNA-Seq.  
400 *Bioinformatics* 25(9):1105-1111.
- 401 9. Anders S, Pyl PT, & Huber W (2015) HTSeq--a Python framework to work with high-throughput  
402 sequencing data. *Bioinformatics* 31(2):166-169.
- 403 10. Anders S & Huber W (2010) Differential expression analysis for sequence count data. *Genome Biol*  
404 11(10):R106.
- 405 11. Du Z, Zhou X, Ling Y, Zhang Z, & Su Z (2010) agriGO: a GO analysis toolkit for the agricultural  
406 community. *Nucleic Acids Res* 38(Web Server issue):W64-70.
- 407 12. Katoh K & Standley DM (2013) MAFFT multiple sequence alignment software version 7: improvements  
408 in performance and usability. *Mol Biol Evol* 30(4):772-780.
- 409 13. Tamura K, *et al.* (2011) MEGA5: molecular evolutionary genetics analysis using maximum likelihood,  
410 evolutionary distance, and maximum parsimony methods. *Mol Biol Evol* 28(10):2731-2739.
- 411 14. Wisniewski JR, Zougman A, Nagaraj N, & Mann M (2009) Universal sample preparation method for  
412 proteome analysis. *Nat Methods* 6(5):359-362.

- 413 15. Xiong GH, *et al.* (2015) High throughput profiling of the cotton bollworm *Helicoverpa armigera*  
414 immunotranscriptome during the fungal and bacterial infections. *BMC Genomics* 16:321.  
415
